# Supplementary material for: Limitations in the Use of Indices Using Glucose and Insulin Levels to Predict Insulin Sensitivity: Impact of race and gender and superiority of the indices derived from oral glucose tolerance test in African Americans
Source: PubMed Central journal article supplement — Diabetes Care. 2013 Mar 14;36(4):845–53. doi: 10.2337/dc12-0840 (PMC3609485; doi:10.2337/dc12-0840), 2013-03-14
Supplement: supp_dc12-0840v120840_DC120840SupplementaryData.pdf [file supp_dc12-0840v120840_DC120840SupplementaryData.pdf]

SUPPLEMENTARY DATA

**Supplementary Table 1.** Correlation coefficients between common indices of insulin sensitivity and glucose disposal rate (GDR) per lean body mass without BMI adjustment

|                | Correlation coefficients between common indices of insulin sensitivity and GDR |                    |                    |                      |                    |                                                  |                           |                          |                           |                            |
|----------------|--------------------------------------------------------------------------------|--------------------|--------------------|----------------------|--------------------|--------------------------------------------------|---------------------------|--------------------------|---------------------------|----------------------------|
|                | Indices employed fasting condition                                             |                    |                    |                      |                    | Indices derived from oral glucose tolerance test |                           |                          |                           |                            |
|                | N                                                                              | FIL<br><i>R</i>    | HOMA<br><i>R</i>   | Log HOMA<br><i>R</i> | QUICKI<br><i>R</i> | N                                                | Matsuda index<br><i>R</i> | Simple index<br><i>R</i> | Avignon index<br><i>R</i> | Stumvoll index<br><i>R</i> |
| total subjects | 240                                                                            | -<br><b>0.392*</b> | -<br><b>0.399*</b> | -0.433*              | <b>0.385*</b>      | 198                                              | <b>0.468*</b>             | <b>0.511*</b>            | <b>0.353*</b>             | <b>0.469*</b>              |
| all EA         | 141                                                                            | -<br><b>0.429*</b> | -<br><b>0.471*</b> | -0.432*              | <b>0.370*</b>      | 119                                              | <b>0.445*</b>             | <b>0.507*</b>            | <b>0.404*</b>             | <b>0.514*</b>              |
| EA male        | 68                                                                             | -<br><b>0.437*</b> | -<br><b>0.472*</b> | -0.510*              | <b>0.406\$</b>     | 51                                               | <b>0.545*</b>             | <b>0.566*</b>            | <b>0.417\$</b>            | <b>0.562*</b>              |
| EA female      | 73                                                                             | -<br><b>0.424*</b> | -<br><b>0.471*</b> | -0.343*              | <b>0.355\$</b>     | 68                                               | <b>0.351\$</b>            | <b>0.469*</b>            | <b>0.417*</b>             | <b>0.497*</b>              |
| all AA         | 99                                                                             | -<br><b>0.386*</b> | -<br><b>0.367*</b> | -0.452*              | <b>0.406*</b>      | 79                                               | <b>0.531*</b>             | <b>0.529*</b>            | <b>0.293\$</b>            | <b>0.427*</b>              |
| AA male        | 43                                                                             | 0.009              | 0.025              | -0.318               | <b>0.185</b>       | 34                                               | <b>0.406#</b>             | <b>0.405#</b>            | <b>0.218</b>              | <b>0.317</b>               |
| AA female      | 56                                                                             | -<br><b>0.538*</b> | -<br><b>0.531*</b> | -0.520*              | <b>0.521*</b>      | 45                                               | <b>0.593*</b>             | <b>0.603*</b>            | <b>0.414\$</b>            | <b>0.499*</b>              |
| all male       | 111                                                                            | -<br><b>0.208#</b> | -<br><b>0.214#</b> | -0.446*              | <b>0.328\$</b>     | 85                                               | <b>0.487*</b>             | <b>0.503*</b>            | <b>0.351\$</b>            | <b>0.423*</b>              |
| all female     | 129                                                                            | -<br><b>0.482*</b> | -<br><b>0.496*</b> | -0.432*              | <b>0.444*</b>      | 113                                              | <b>0.458*</b>             | <b>0.525*</b>            | <b>0.394*</b>             | <b>0.491*</b>              |

N is the number in each group, *R* is the correlation coefficient. All bold values are statistically significant.  
# *P* < 0.05, \$ *P* < 0.01, \* *P* < 0.001

SUPPLEMENTARY DATA

**Supplementary Table 2.** Comparison of correlation coefficients between common indices of insulin sensitivity and glucose disposal rate (GDR) per lean body mass.

|                       | <b>P-value compare correlation coefficients between insulin sensitivity indices and GDR</b> |                          |                     |                      |                      |                       |                              |                         |                         |                          |                                 |
|-----------------------|---------------------------------------------------------------------------------------------|--------------------------|---------------------|----------------------|----------------------|-----------------------|------------------------------|-------------------------|-------------------------|--------------------------|---------------------------------|
|                       | HOMA<br>VS<br>FIL                                                                           | Log<br>HOMA<br>VS<br>FIL | QUICKI<br>VS<br>FIL | Matsuda<br>VS<br>FIL | Avignon<br>VS<br>FIL | Stumvoll<br>VS<br>FIL | Simple<br>index<br>VS<br>FIL | Matsuda<br>VS<br>QUICKI | Avignon<br>VS<br>QUICKI | Stumvoll<br>VS<br>QUICKI | Simple<br>index<br>VS<br>QUICKI |
| <b>total subjects</b> | NS                                                                                          | NS                       | NS                  | NS                   | NS                   | NS                    | NS                           | 0.04#                   | NS                      | NS                       | 0.04#                           |
| <b>all EA</b>         | 0.04#                                                                                       | NS                       | NS                  | NS                   | NS                   | NS                    | NS                           | 0.01#                   | NS                      | NS                       | NS                              |
| EA male               | NS                                                                                          | NS                       | NS                  | NS                   | NS                   | NS                    | NS                           | NS                      | NS                      | NS                       | NS                              |
| EA female             | NS                                                                                          | NS                       | NS                  | NS                   | NS                   | NS                    | NS                           | NS                      | NS                      | NS                       | NS                              |
| <b>all AA</b>         | NS                                                                                          | NS                       | NS                  | NS                   | NS                   | NS                    | NS                           | 0.01#                   | NS                      | NS                       | NS                              |
| AA male               | NS                                                                                          | 0.008#                   | 0.006#              | 0.002#               | NS                   | 0.02#                 | 0.005#                       | 0.02#                   | NS                      | NS                       | NS                              |
| AA female             | NS                                                                                          | NS                       | NS                  | NS                   | NS                   | NS                    | NS                           | NS                      | NS                      | NS                       | NS                              |
| <b>all male</b>       | NS                                                                                          | 0.003#                   | 0.05#               | 0.007#               | NS                   | 0.03#                 | 0.005#                       | 0.04#                   | NS                      | NS                       | NS                              |
| <b>all female</b>     | NS                                                                                          | NS                       | NS                  | NS                   | NS                   | NS                    | NS                           | NS                      | NS                      | NS                       | NS                              |

NS, non-significant p-value; GDR, glucose disposal rate measured by hyperinsulinemic clamp; FIL, fasting insulin level; HOMA, the homostatic model assessment for insulin resistance; QUICKI, the quantitative insulin sensitivity check index;  $SI_{is}$ OGTT, the simple index assessing insulin sensitivity using oral glucose tolerance test. # Significance indicates superiority of the top index VS the bottom index; † Significance indicates superiority of the bottom index VS the top index.

SUPPLEMENTARY DATA

Supplementary Table 2(continued).

|                       | <b><i>P</i>-value compare correlation coefficients between insulin sensitivity indices and GDR</b> |                          |                          |               |                         |                          |                         |                         |               |                |                       |
|-----------------------|----------------------------------------------------------------------------------------------------|--------------------------|--------------------------|---------------|-------------------------|--------------------------|-------------------------|-------------------------|---------------|----------------|-----------------------|
|                       | Log<br>HOMA<br>VS                                                                                  | QUICKI<br>VS             | Matsuda<br>VS            | Avignon<br>VS | Stumvoll<br>VS          | Simple<br>index<br>VS    | QUICKI<br>VS            | Matsuda<br>VS           | Avignon<br>VS | Stumvoll<br>VS | Simple<br>index<br>VS |
|                       | HOMA                                                                                               | HOMA                     | HOMA                     | HOMA          | HOMA                    | HOMA                     | Log<br>HOMA             | Log<br>HOMA             | Log<br>HOMA   | Log<br>HOMA    | Log<br>HOMA           |
| <b>total subjects</b> | NS                                                                                                 | NS                       | NS                       | NS            | NS                      | NS                       | NS                      | NS                      | NS            | NS             | NS                    |
| <b>all EA</b>         | NS                                                                                                 | <b>0.02<sup>†</sup></b>  | NS                       | NS            | NS                      | NS                       | <b>0.03<sup>†</sup></b> | NS                      | NS            | NS             | NS                    |
| EA male               | NS                                                                                                 | NS                       | NS                       | NS            | NS                      | NS                       | NS                      | NS                      | NS            | NS             | NS                    |
| EA female             | NS                                                                                                 | NS                       | NS                       | NS            | NS                      | NS                       | NS                      | NS                      | NS            | NS             | NS                    |
| <b>all AA</b>         | NS                                                                                                 | NS                       | <b>0.04<sup>#</sup></b>  | NS            | NS                      | <b>0.04<sup>#</sup></b>  | NS                      | NS                      | NS            | NS             | NS                    |
| AA male               | <b>0.001<sup>#</sup></b>                                                                           | <b>0.003<sup>#</sup></b> | <b>0.002<sup>#</sup></b> | NS            | <b>0.02<sup>#</sup></b> | <b>0.004<sup>#</sup></b> | NS                      | <b>0.02<sup>#</sup></b> | NS            | NS             | NS                    |
| AA female             | NS                                                                                                 | NS                       | NS                       | NS            | NS                      | NS                       | NS                      | NS                      | NS            | NS             | NS                    |
| <b>all male</b>       | <b>0.02<sup>#</sup></b>                                                                            | <b>0.04<sup>#</sup></b>  | <b>0.009<sup>#</sup></b> | NS            | <b>0.03<sup>#</sup></b> | <b>0.004<sup>#</sup></b> | NS                      | NS                      | NS            | NS             | NS                    |
| <b>all female</b>     | NS                                                                                                 | NS                       | NS                       | NS            | NS                      | NS                       | NS                      | NS                      | NS            | NS             | NS                    |

NS, non-significant p-value; GDR, glucose disposal rate measured by hyperinsulinemic clamp; FIL, fasting insulin level; HOMA, the homostatic model assessment for insulin resistance; QUICKI, the quantitative insulin sensitivity check index;  $SI_{is}$ OGTT, the simple index assessing insulin sensitivity using oral glucose tolerance test. # Significance indicates superiority of the top index VS the bottom index; † Significance indicates superiority of the bottom index VS the top index.

SUPPLEMENTARY DATA

Supplementary Table 2 (continued).

|                | <b>P-value compare correlation coefficients between insulin sensitivity indices and GDR</b> |                           |                                  |                           |                                  |                                   |
|----------------|---------------------------------------------------------------------------------------------|---------------------------|----------------------------------|---------------------------|----------------------------------|-----------------------------------|
|                | Avignon<br>VS<br>Matsuda                                                                    | Stumvoll<br>VS<br>Matsuda | Simple<br>index<br>VS<br>Matsuda | Stumvoll<br>VS<br>Avignon | Simple<br>index<br>VS<br>Avignon | Simple<br>index<br>VS<br>Stumvoll |
| total subjects | NS                                                                                          | NS                        | NS                               | NS                        | 0.006 <sup>#</sup>               | NS                                |
| all EA         | NS                                                                                          | NS                        | NS                               | NS                        | NS                               | NS                                |
| EA male        | NS                                                                                          | NS                        | NS                               | NS                        | NS                               | NS                                |
| EA female      | NS                                                                                          | NS                        | NS                               | NS                        | NS                               | NS                                |
| all AA         | 0.02 <sup>†</sup>                                                                           | NS                        | NS                               | NS                        | 0.003 <sup>#</sup>               | NS                                |
| AA male        | NS                                                                                          | NS                        | NS                               | NS                        | NS                               | NS                                |
| AA female      | NS                                                                                          | NS                        | NS                               | NS                        | 0.04 <sup>#</sup>                | NS                                |
| all male       | NS                                                                                          | NS                        | NS                               | NS                        | NS                               | NS                                |
| all female     | NS                                                                                          | NS                        | 0.01 <sup>#</sup>                | NS                        | 0.05 <sup>#</sup>                | NS                                |

NS, non-significant p-value; GDR, glucose disposal rate measured by hyperinsulinemic clamp; FIL, fasting insulin level; HOMA, the homostatic model assessment for insulin resistance; QUICKI, the quantitative insulin sensitivity check index; SI<sub>is</sub>OGTT, the simple index assessing insulin sensitivity using oral glucose tolerance test. # Significance indicates superiority of the top index VS the bottom index; † Significance indicates superiority of the bottom index VS the top index.
